# Supplementary material
Source: Springer Nature journal article supplement (https://www.springermedizin.de/resource/supplementary/12885_2010_2878_MOESM1_ESM.pdf/9462192)

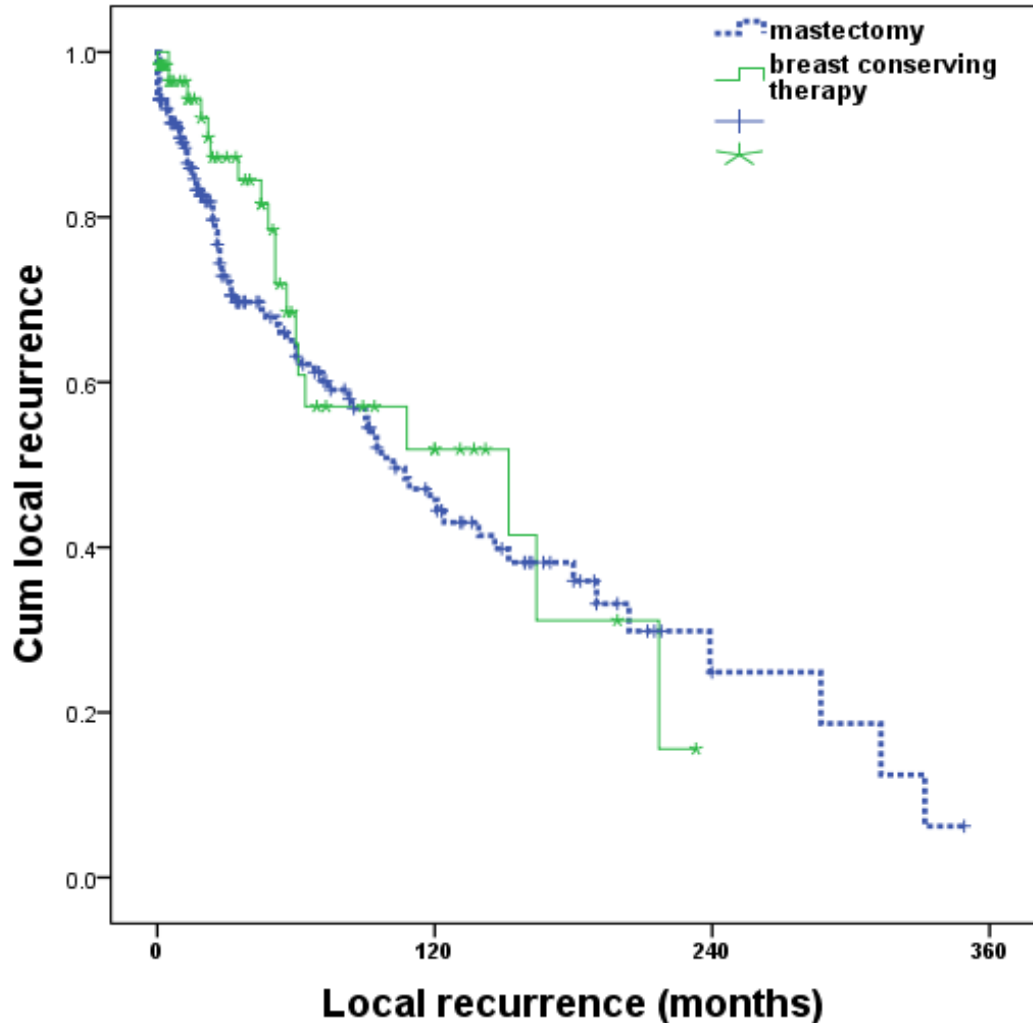

**Log-rank**

*P value = 0.455*  
 $\chi^2 = 0.558, df = 1$

**At Risk:**

|            |         |          |          |          |
|------------|---------|----------|----------|----------|
| Mastectomy | 190 (0) | 120 (70) | 112 (78) | 109 (81) |
| BCS        | 61 (0)  | 55 (16)  | 52 (19)  | 52 (19)  |

Supplement: MOESM1 [file 9462192]
